# Supplementary material for: Die Medienkampagne „Deine Chance“
Source: Atypon-hosted journal article supplement (doi:10.1024/0939-5911/a000803), 2023-02-01
Supplement: 0939-5911_a000803_esm1.pdf [file 0939-5911_a000803_esm1.pdf]

## Elektronisches Supplement

### ESM 1. Beispiel eines Werbeplakats der „Deine Chance“ Kampagne



**Deine Chance**

**140 Tage nicht rauchen – schon hast du neue Räder für die Familie drin.**

Dein Geld kann mehr als nur verbrennen: Wünsche erfüllen zum Beispiel. Also, hör auf zu rauchen und fang an zu leben. Wir helfen dir dabei – mit unseren erfolgreich geprüften Unterstützungsangeboten auf [nutzedeinechance.de](https://nutzedeinechance.de)

 [nutzedeinechance.de](https://nutzedeinechance.de)

Quelle: Bundesministerium für Gesundheit.
