# Supplementary material for: Die Medienkampagne „Deine Chance“
Source: Atypon-hosted journal article supplement (doi:10.1024/0939-5911/a000803), 2023-02-01
Supplement: 0939-5911_a000803_esm2.pdf [file 0939-5911_a000803_esm2.pdf]

## Elektronisches Supplement

ESM 2. Darstellung des zeitlichen Ablaufs der Kampagne mit Auflistung der einzelnen DEBRA Wellen (blau) und Mediawellen (rot).  
Web+ GMX/ t-online = E-Mail Browser; ooH= Außenwerbung.

# Werbemiteinsatz und Mediawellen

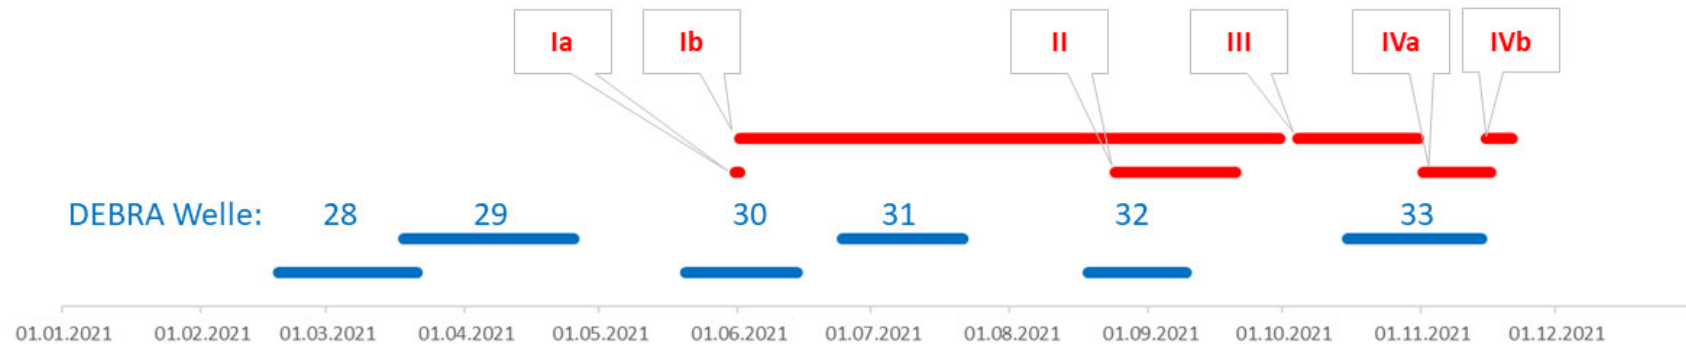

Mit Budget von rd. 720 T € erreichte Kontakte bzw. AI / Clicks:

- Media Ia/Ib+III Webbanner (u.a. BILD) rd. **48 Mio.** Ausspielungen & rd. **133 T clicks**
- Media II Bodenaufkleber und CLP in Bahnhöfen (rd. **1 Mio.** Kontaktchancen)
- Media IVa Webbanner und IVb UKW-Funk (**9,1 Mio.** Ausspielungen / Kontaktchancen)

kontinuierlicher Werbemiteinsatz (vier Mediawellen) vom 31.05. – 21.11.2021:

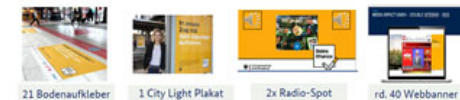

Quelle: Bundesministerium für Gesundheit, Vortrag 19. Deutsche Konferenz für Tabakkontrolle 15.12.2021.
